# Supplementary material for: Comprehensive analysis of ICD-related lncRNAs in predicting risk stratification, clinical prognosis and immune response for breast cancer
Source: Aging (Albany NY). 2023 Sep 9;15(17):8833–50. doi: 10.18632/aging.205002 (PMC10522379; doi:10.18632/aging.205002)
Supplement: Supplementary Table 2 [file aging-15-205002-s002.xlsx]

## Sheet: Sheet1
Supplementary Table 2. The identified ICDRLs genes.
LINC02084
AL391244.1
AC002091.1
LINC02391
AL355353.1
AC021188.1
AC147651.3
AP003068.1
AL359220.1
LINC01352
MIAT
LINC01281
AP001189.1
PRKCQ-AS1
OIP5-AS1
AC015819.1
FAM30A
AC087286.2
RRN3P2
AC022706.1
LINC00941
AC000403.1
AL121832.2
AP001505.1
Z99289.1
AC016773.1
OSTN-AS1
AC110285.6
AC145098.1
AC087239.1
CELF2-AS1
AL357033.4
AC008906.1
AL591468.1
LINC002481
AC074212.1
AC092376.2
AC007384.1
NRIR
AC026803.2
YTHDF3-AS1
AP002954.1
MIR99AHG
HAND2-AS1
USP30-AS1
AC112715.1
AL161725.1
AC026369.3
MIR100HG
LINC02185
AC246787.2
SNHG12
LINC02100
AC012510.1
AL157786.1
FLJ42351
AL355472.1
ENTPD1-AS1
LINC00582
AC005034.5
AC007292.1
AC040162.3
AC093278.2
LINC02328
AC004687.1
AC007000.3
AC092919.1
AC116366.1
ARRDC1-AS1
AC062017.1
AL133406.2
LINC02511
LINC02273
AC025569.1
AC092803.2
H1FX-AS1
MIR22HG
AL451085.2
AP005019.1
SENCR
AC119428.2
AC007750.1
AC011899.2
AL590764.1
TRG-AS1
TBX5-AS1
AC108449.2
AC002091.2
AP006621.3
AP001434.1
CARD8-AS1
AC010331.1
AL109914.1
CR936218.1
AL157394.1
AL139246.3
AC243960.1
AL133467.1
AC007336.2
MSC-AS1
AL357060.1
AC092718.4
MMP2-AS1
AC108463.2
AC107959.1
AL161457.2
AC069209.1
AC067945.3
AC083880.1
AC016876.3
U62317.2
AC121247.1
LINC01857
AC008622.2
AL671710.1
LINC01055
AP003774.4
LINC01094
AP000695.1
LINC02195
AC010973.2
XXYLT1-AS2
KMT2E-AS1
AC007728.2
AL034397.3
LINC01504
LINC01023
AL109741.1
LINC00922
LINC01871
LINC00996
AC112491.1
AC005291.2
AC096921.2
AL109955.1
AC027449.1
LINC02384
AC083862.2
AC010247.2
AC011899.3
AC004585.1
AC027097.2
AF127936.1
LINC01150
AC015911.3
MAGI2-AS3
AC009065.4
AC008610.1
U62631.1
LINC02416
AC098613.1
LINC01943
PITPNA-AS1
MIR155HG
LINC01311
C9orf139
AC010175.1
AC008750.1
SNHG15
MIR3945HG
AC004847.1
LINC00892
AC009950.1
AC010531.6
AL133371.2
AC108134.3
AL021707.6
CAHM
AL135818.1
LINC02362
AL445426.1
AC110995.1
SNHG7
AC069281.2
AC073072.1
AC090152.1
LINC02446
AC090559.1
AP003392.3
AP001189.3
AL390719.2
AL513320.1
Z84484.1
EBLN3P
